# Supplementary material for: Cost-Effectiveness of Influenza Vaccination Strategies in Adults: Older Adults Aged ≥65 Years, Adults Aged 50–64 Years, and At-Risk Adults Aged 19–64 Years
Source: MDPI journal article supplement (doi:10.3390/vaccines10030445), 2022-03-14

**Supplementary Table S1.** List of ICD-10 codes used in the definition.

This study extracted broad diagnostic codes that could be used for visits to hospitals with influenza-like illness (ILI) to obtain adequate influenza incidence. ILI codes were divided into four categories: (1) acute upper respiratory disease, (2) bronchitis/bronchiolitis, (3) pneumonia, and (4) seasonal influenza.

| Disease Group                            | Definition                      | ICD-10 Codes                                                                             |
|------------------------------------------|---------------------------------|------------------------------------------------------------------------------------------|
| At-risk groups                           | Chronic respiratory disease     | J43-47, J60-65, J84                                                                      |
|                                          | Chronic heart disease           | I05-09, I21-25, I34-37, I39.0-39.4, I42-43, I50                                          |
|                                          | Chronic renal disease           | N03-08, N18-19, I12.0, I13,                                                              |
|                                          | Chronic liver disease           | B18, K50-51, K70.3, K71.7, K73, K74, K75.4, K76.7                                        |
|                                          | Neurologic disease              | I60-69, G20-23, F00-03, G30-32, G35-37, G40-41, G70, G71, G10-14, G80-83, T91.3, R56.8   |
|                                          | Metabolic disease               | E10-16, E24, G59.0, G63.2, N08.3, H28.0                                                  |
|                                          | Autoimmune disease              | M05-09, M30-36, N08.5, N16.4                                                             |
|                                          | Cancer or hematologic disease   | C00-97, D46, D55-64, D70-77, D80-89                                                      |
| Influenza-like illness diagnostic codes  | Immunosuppressed state          | B20-24, D73.0                                                                            |
|                                          | Acute upper respiratory disease | J00, J01, J02, J03, J04, J05, J06                                                        |
|                                          | Bronchitis / bronchiolitis      | J20, J21, J22                                                                            |
|                                          | Pneumonia                       | J12, J13, J14, J15, J16, J17.0, J17.1, J17.8, J18                                        |
| Acute complications related to influenza | Seasonal influenza              | J09, 10, 11                                                                              |
|                                          | Pneumonia                       | J12, J13, J14, J15, J16, J17, J18                                                        |
|                                          | Encephalitis                    | A85.8, A86, A87.8, A87.9, A89, B94.1, G038, G039, G04.0, G04.8, G04.9, G05.1, G05.8, G36 |
|                                          | Myositis                        | M60.0, M60.1, M60.8, M60.9                                                               |
|                                          | Myocarditis, pericarditis       | I41.1, I51.4, I30, I31.9, I40, I51.8, B33.2                                              |
|                                          | Acute myocardial infarction     | I21, I23, I24                                                                            |
|                                          | Stroke                          | I63                                                                                      |
|                                          | Rhabdomyolysis                  | M62.8                                                                                    |
| Acute exacerbation of chronic disease    | Transverse myelitis             | G37.3, G37.8, G37.9                                                                      |
|                                          | Chronic respiratory disease     | J41, J42, J43, J44, J45, J47                                                             |
|                                          | Chronic liver disease           | B18, K70.3, K71.7, K73, K74                                                              |
|                                          | Chronic renal disease           | N18, N19                                                                                 |
|                                          | Chronic heart disease           | I25, I42, I50                                                                            |
|                                          | Diabetes                        | E10-14                                                                                   |

**Supplementary Table S2.** Daily and yearly salaries in Korea in 2018<sup>a</sup>.

| Age group   | Monthly regular payment (\$) <sup>b</sup> | Employment rate (%) | Daily regular payment (\$) <sup>b</sup> | Yearly regular payment (\$) <sup>b</sup> |
|-------------|-------------------------------------------|---------------------|-----------------------------------------|------------------------------------------|
| 19–24 years | 1,881.72                                  | 49.5                |                                         | 11,177.42                                |
| 25–29 years | 2,461.47                                  | 78.3                |                                         | 23,127.97                                |
| 30–34 years | 3,025.09                                  | 79.5                |                                         | 28,859.35                                |
| 35–39 years | 3,470.43                                  | 78.4                |                                         | 32,649.81                                |
| 40–44 years | 3,726.70                                  | 80.0                |                                         | 35,776.34                                |
| 45–49 years | 3,830.65                                  | 82.0                |                                         | 37,693.55                                |
| 50–54 years | 3,736.56                                  | 79.9                |                                         | 35,826.13                                |
| 55–59 years | 3,368.28                                  | 75.7                |                                         | 30,597.45                                |
| 60–64 years | 2,409.50                                  | 62.6                |                                         | 18,100.15                                |
| 19–64 years | 3,165.54                                  | 49.5–82             | 79.36                                   |                                          |
| 50–64 years | 3,223.96                                  | 62.6–79.9           | 79.08                                   |                                          |

<sup>a</sup>This table was created by reconstituting the 2018 Survey Report on Labor Conditions by employment type [1] and economically active population [2].

<sup>b</sup> USD 1 = KRW 1,116

**Supplementary Table S3.** Influenza circulation, lineage, and matching in Korea.

| Season    | Mismatching B [3] | Proportion of influenza type B  |                    |
|-----------|-------------------|---------------------------------|--------------------|
|           |                   | From HIMM data<br>(unpublished) | From KDCA data [4] |
| 2010–2011 | 57.1%             | -                               | 0.9%               |
| 2011–2012 | 27%               | 29.3%                           | 48.5%              |
| 2012–2013 | 64.6%             | 9.5%                            | 5.6%               |
| 2013–2014 | 85.9%             | 30.2%                           | 52.9%              |
| 2014–2015 | 0%                | 25.8%                           | 37.1%              |
| 2015–2016 | 97%               | 20.6%                           | 51.1%              |
| 2016–2017 | 87.1%             | -                               | 26.6%              |
| 2017–2018 | 98.6%             | -                               | 54.8%              |
| Average   | 64.7%             | 23.1%                           | 34.7%              |

KDCA, Korea Disease Control and Prevention Agency; HIMM, Hospital-based Influenza Morbidity and Mortality.

**Supplementary Table S4.** Parameters and ranges used in sensitivity analysis.

|                                            | Base-analysis | One-way     |             | PSA distribution |
|--------------------------------------------|---------------|-------------|-------------|------------------|
|                                            |               | Lower limit | Upper limit |                  |
| <b>Cost, \$</b>                            |               |             |             |                  |
| Vaccination cost of QIV (the elderly)      | 28.24         | 22.86       | 37.20       | Triangular       |
| Vaccination cost of QIV (19–64 years)      | 30.95         | 25.22       | 37.20       | Triangular       |
| Vaccination cost of ATIV                   | 30.55         | 26.70       | 38.25       | Triangular       |
| Vaccination cost of HD-QIV                 | 30.55         | 26.70       | 38.25       | Triangular       |
| Rapid antigen test                         | 17.92         | 10.93       | 46.15       | Triangular       |
| Nursing cost (the elderly)                 | 51.18         | –20%        | +20%        | Triangular       |
| Nursing cost (19–64 years)                 | 41.90         | –20%        | +20%        | Triangular       |
| Transportation cost                        | 21.64         | –20%        | +20%        | Triangular       |
| Direct medical cost                        | Base          | –20%        | +20%        | Lognormal        |
| Length of stay (or number of visits), days | Base          | N/A         | N/A         | Gamma            |
| Discount rate, %                           | 4.5           | 0           | 7.5         | -                |
| Utilities                                  | Base          | –20%        | +20%        | Triangular       |
| Incidence, %                               | Base          | –20%        | +20%        | Triangular       |

NIP, national immunization program; PSA, probabilistic sensitivity analysis.

**Supplementary Table S5.** Base case analysis from a societal perspective (per person cost and effectiveness) in the context of the herd effect.

|                             |         | Cost (USD)  | Incremental<br>cost (ΔUSD) | Effectiveness (QALY) | Incremental<br>effectiveness<br>(ΔQALY) | ICER<br>(ΔUSD/<br>QALY) |
|-----------------------------|---------|-------------|----------------------------|----------------------|-----------------------------------------|-------------------------|
| <b>≥ 65 years</b>           |         |             |                            |                      |                                         |                         |
| <b>At-least herd effect</b> | TIV     | 363,508,533 |                            | 6,457,914            |                                         |                         |
|                             | QIV     | 378,601,928 | 15,093,395                 | 6,458,238            | 324                                     | 46,607                  |
|                             | ATIV    | 381,501,836 | 17,993,303                 | 6,458,437            | 523                                     | 34,380                  |
|                             | HD-QIV  | 360,969,390 | -2,539,143                 | 6,458,786            | 873                                     | Cost-saving             |
| <b>Maximum herd effect</b>  | TIV     | 349,250,952 |                            | 6,458,156            |                                         |                         |
|                             | QIV     | 365,845,533 | 16,594,581                 | 6,458,454            | 298                                     | 55,628                  |
|                             | ATIV    | 369,645,487 | 20,394,535                 | 6,458,639            | 483                                     | 42,266                  |
|                             | HD-QIV  | 350,492,321 | 1,241,369                  | 6,458,964            | 808                                     | 1,536                   |
| <b>50–64 years</b>          |         |             |                            |                      |                                         |                         |
| <b>At-least herd effect</b> | Current | 547,809,956 |                            | 11,251,505           |                                         |                         |
|                             | TIV     | 520,764,612 | -27,045,344                | 11,252,147           | 641                                     | Cost-saving             |
|                             | QIV     | 553,742,470 | 5,932,514                  | 11,252,271           | 766                                     | 7,762                   |
| <b>Maximum herd effect</b>  | Current | 524,149,925 |                            | 11,251,652           |                                         |                         |
|                             | TIV     | 503,398,315 | -20,751,610                | 11,252,251           | 599                                     | Cost-saving             |
|                             | QIV     | 537,706,905 | 13,556,980                 | 11,252,367           | 714                                     | 18,842                  |
| <b>19–64 years, at-risk</b> |         |             |                            |                      |                                         |                         |
| <b>At-least herd effect</b> | Current | 302,476,114 |                            | 4,614,873            |                                         |                         |
|                             | TIV     | 276,338,169 | -26,137,944                | 4,615,291            | 418                                     | Cost-saving             |
|                             | QIV     | 286,330,562 | -16,145,551                | 4,615,361            | 489                                     | Cost-Saving             |
| <b>Maximum herd effect</b>  | Current | 288,773,851 |                            | 4,614,959            |                                         |                         |
|                             | TIV     | 266,636,625 | -22,137,226                | 4,615,350            | 390                                     | Cost-saving             |
|                             | QIV     | 277,563,848 | -11,210,003                | 4,615,415            | 456                                     | Cost-saving             |

1. Ministry of Employment and Labor. Employment and Labor Statistics. Available online: <http://laborstat.moel.go.kr/> (accessed August 18, 2021).
2. Korean Statistical Information Service. Available online: [https://kosis.kr/statHtml/statHtml.do?orgId=117&tblId=DT\\_11702\\_N083](https://kosis.kr/statHtml/statHtml.do?orgId=117&tblId=DT_11702_N083) (accessed March 28, 2021).
3. Korean Society of Infectious Disease. *Vaccinations for Adults*, 3rd ed.; Koonja Publishing: Paju, Korea, 2019, p. 184.
4. Korea Disease Control and Prevention Agency. Infectious Disease Portal. Laboratory Newsletter. Available online: <http://www.kdca.go.kr/npt/biz/npp/portal/nppPblctDtaMain.do> (accessed April 4, 2021)

**Supplementary Figure S1.** Sensitivity Analysis of Elderly Individuals A: One-way sensitivity analysis of ATIV compared with TIV. B: One-way sensitivity analysis of HD-QIV compared with TIV. C: Probabilistic sensitivity analysis of ATIV compared with TIV. D: Probabilistic sensitivity analysis of HD-QIV compared with TIV. TIV, trivalent influenza vaccine; ATIV, adjuvanted trivalent influenza vaccine; HD-QIV, high-dose quadrivalent influenza vaccine.

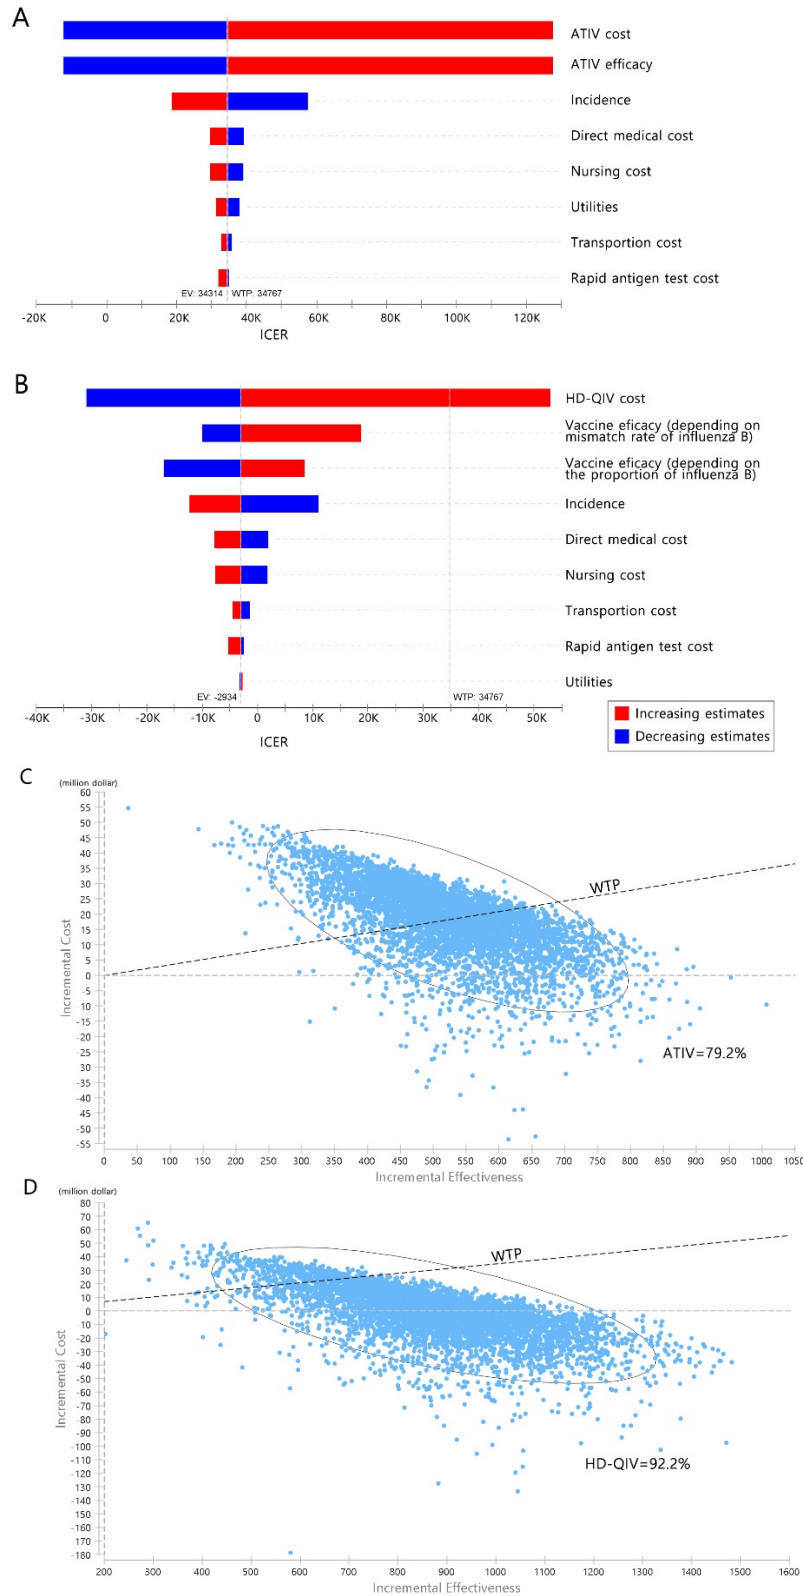

Supplement: s1 [file s1]
